# Supplementary material
Source: Springer Nature journal article supplement (https://www.springermedizin.de/resource/supplementary/12933_2010_291_MOESM1_ESM.pdf/9540032)

- Sedentary control
- Trained control
- △—△ Sedentary diabetic
- ▲—▲ Trained diabetic

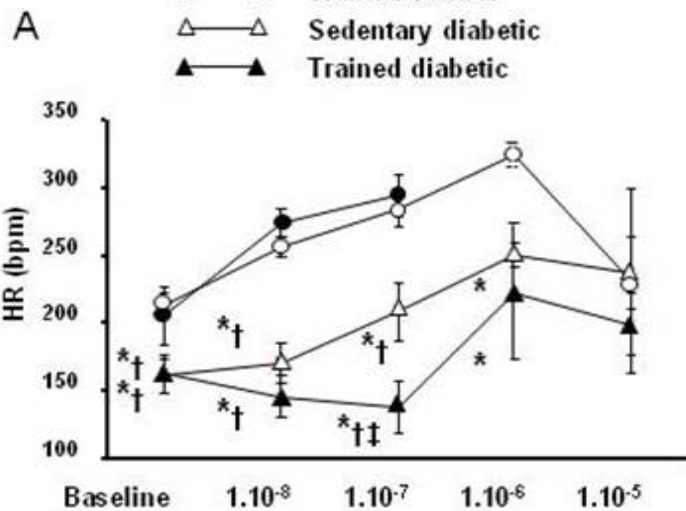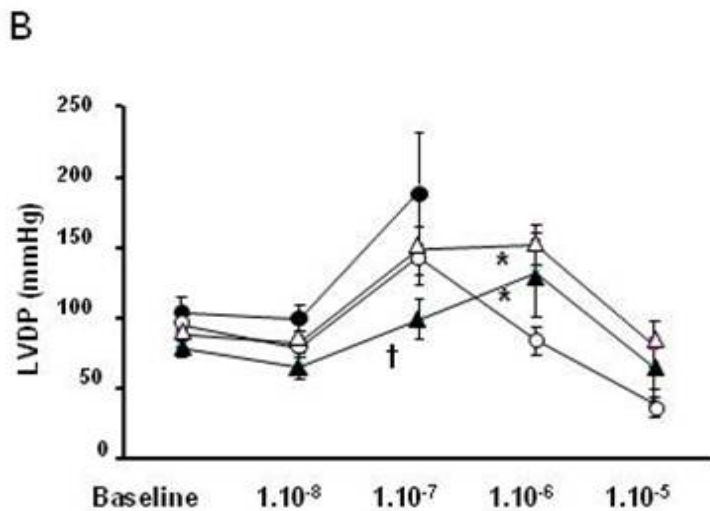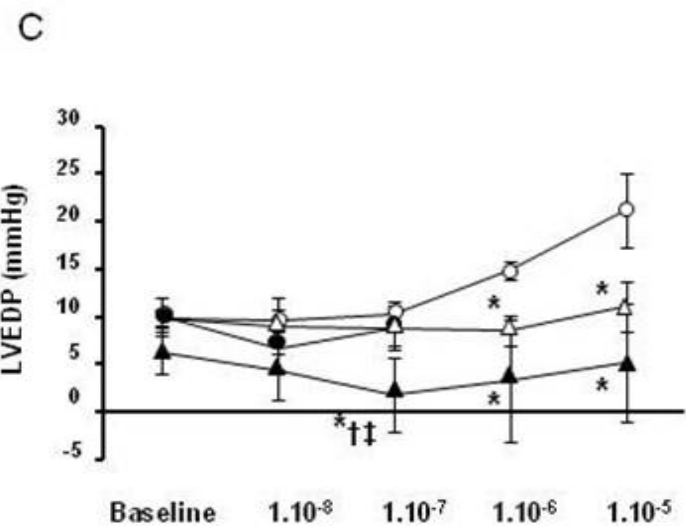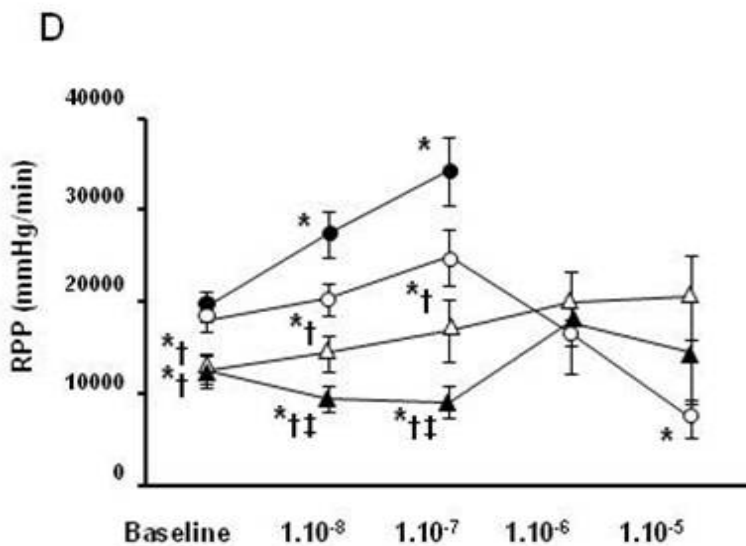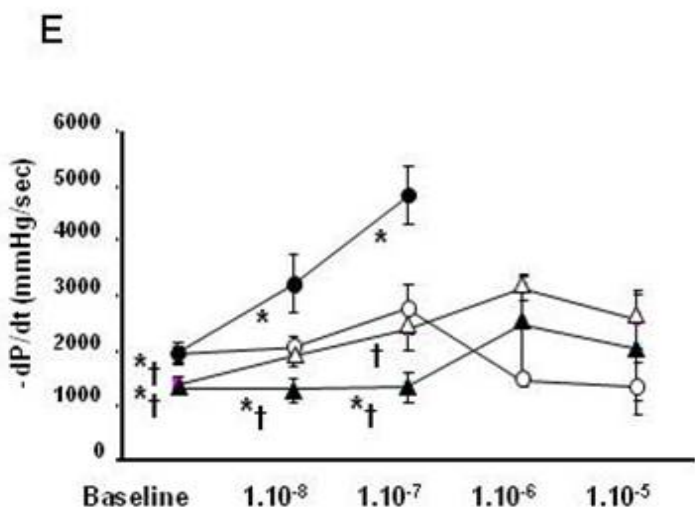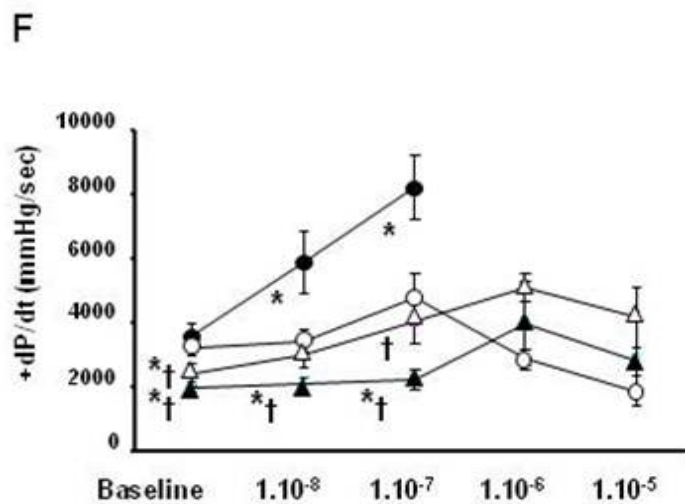

Supplement: MOESM1 [file 9540032]
